# Supplementary material for: Adverse Crosstalk Between Extracellular Matrix Remodeling and Ferroptosis in Basal Breast Cancer
Source: Preprints.org preprint supplement (doi:10.20944/preprints202306.0642.v1), 2023-06-08
Supplement: Supplementary file 3 [file supplementary]

**Appendix**

**Supplemental Figure 1 related to Figure 1: Progesterone and estrogen receptors status of ferroptosis/ECM remodeling gene signature:** A/ Unsupervised principal component analysis performed with ferroptosis/ECM remodeling gene signature and stratified on estrogen receptor status (N: negative, P: positive, IHC: Immunohistochemistry); B/ Unsupervised principal component analysis performed with ferroptosis/ECM remodeling gene signature and stratified on progesterone receptor status.

**Supplemental Figure 2 related to Figure 3: Age influence on distant relapse free survival in breast cancer:** A/ optimal cutpoint determination on age of the patients for the distant relapse free survival residuals; B/ Kaplan Meier for patient age categories stratified at the cutpoint of 40.3 years old.

**Supplemental Figure 3 related to Figure 5: Global and individual Schoenfeld tests for the multivariate distant relapse free survival model and their included parameters**

**Supplemental Table 1: List of the univariate Cox analysis for the 252 ferroptosis related significant genes against Distant Free Relapse Survival in transcriptome cohort (GSE25066).**
